# Supplementary material for: Photo-stabilised microemulsions
Source: Royal Society of Chemistry journal article supplement (doi:10.1039/b503379a), 2005-01-01
Supplement: b503379a.pdf [file b503379a.pdf]

## Supporting material - Photo-stabilised microemulsions

**Julian Eastoe\*, Margarita Sanchez-Dominguez, Ana Vesperinas and Paul Wyatt**

School of Chemistry, University of Bristol, Bristol, BS8 1TS, UK.

**Richard K. Heenan**

ISIS-CLRC, Rutherford Appleton Laboratory, Chilton, Oxon, OX11 0QX, UK.

---

### Sample preparation

Since *E*-SGP was insoluble in heptane, and its Krafft temperature in water  $T_K$  was  $\sim 45^\circ\text{C}$ , the samples were prepared as follows: surfactants and  $\text{D}_2\text{O}$  were weighed in a 5 mL volumetric flask, heptane was added, the mixtures were then sonicated at  $\sim 50^\circ\text{C}$  for  $\sim 15$  minutes. Additional heptane was added to 5 mL and the samples were equilibrated at  $50^\circ\text{C}$  for at least 2 hours prior to irradiation/measurement. In this way, two sets of samples were prepared, one set for irradiation and another for SANS experiments.

### Irradiation and characterization of photo-products

Samples were irradiated for 30 minutes, thermostated at  $50^\circ\text{C}$  and stirred with a magnetic flea, in quartz cuvettes (2 cm path length) with a 100 W High pressure Hg lamp (LPS-220/250 power supply from PTI; lamp housing from HI-TECH Scientific and Mercury short arc photo optic lamp HBO<sup>®</sup> 103 W/2), which was polychromatic to maximize the photon flux. The photographs in Figure 1 were taken at room temperature, with a maximum time delay of 15 seconds after irradiation at the higher temperature. The identity and composition of photoproducts was analyzed by  $^1\text{H}$  NMR (Jeol Delta 270), using a post-irradiated sample  $X_{\text{SGP}} = 7.5\%$  and  $w_0 = 30$ , the heptane was removed by rotary evaporation and replaced by 1 mL of methanol- $\text{d}_4$  (Cambridge Isotopes Laboratories, 99.8%). Spectral assignments were made as documented elsewhere [1].

SANS experiments were carried out at the D22 diffractometer at ILL (Grenoble, France) using a neutron wavelength of  $\lambda = 10 \text{ \AA}$  at two different detector distances to cover a Q range of  $0.0024 \rightarrow 0.37 \text{ \AA}^{-1}$ , and also at the time-of-flight LOQ instrument at ISIS, UK where incident wavelengths are  $2.2 \leq \lambda \leq 10 \text{ \AA}$ , resulting in an effective Q range of  $0.009 \rightarrow 0.249 \text{ \AA}^{-1}$  [2]. Absolute intensities for  $I(Q)$  ( $\text{cm}^{-1}$ ) were determined to within  $\pm 5\%$  by measuring the incoherent scattering from 1 mm of  $\text{H}_2\text{O}$  at ILL, whereas at ISIS a partially deuterated polymer standard was employed [2]. Two neutron contrasts were prepared: “shell”, comprising  $\text{D}_2\text{O}$ :H-SGP + H-DDAB:*d*-heptane “shell” (Figure 1, Table 1), and “core” contrast with  $\text{D}_2\text{O}$ :H-SGP + H-DDAB:*h*-heptane (Table A). The neutron beam was scattered from the upper transparent microemulsion phase, missing the denser separated part in the case of pre-irradiated samples. Experiments were carried out at  $50^\circ\text{C}$ , using 2 mm (shell contrast), or 1 mm (core contrast) path-length quartz cells.

### SANS analysis model

For polydisperse, homogeneous spherical particles the SANS intensity  $I(Q)$  / ( $\text{cm}^{-1}$ ) is given by,

$$I(Q) = N_P [P(Q,R) p(R)] S(Q) + B_{inc} \quad (\text{A1})$$

where  $I(Q)$  is the absolute scattering intensity,  $N_P$  is the particle number density,  $P(Q)$  is the single particle form factor,  $p(R)$  is a normalised distribution function,  $S(Q)$  is the inter-particle structure factor, which accounts for interactions. In these dilute w/o systems, away from attractive phase boundaries (absence of low Q critical scattering), inter-particle interactions may be approximated to a hard-sphere structure factor  $S_{HS}(Q)$ , based on the known surfactant + water volume fraction and estimated droplet radius [3 - 5]. The level  $B_{inc}$  represents a sample-dependent isotropic incoherent background, which is determined by measuring an appropriate solvent. For the core-shell spherical particles in “shell” contrast  $P(Q,R)$  is given by [3]

$$P(Q,R) = \frac{16\pi^2}{9} \left[ (\rho_{shell} - \rho_{oil}) 3R_D^3 \left( \frac{\sin QR_D - QR_D \cos QR_D}{(QR_D)^3} \right) - 3R_C^3 \left( \frac{\sin QR_C - QR_C \cos QR_C}{(QR_C)^3} \right) \right]^2 + (\rho_{core} - \rho_{oil}) 3R_C^3 \left( \frac{\sin QR_C - QR_C \cos QR_C}{(QR_C)^3} \right)^2 \quad (\text{A2})$$

# Supplementary Material (ESI) for Chemical Communications

# This journal is © The Royal Society of Chemistry 2005

where  $R_D$  the droplet radius,  $R_C$  the core radius (also called  $R_{D2O}$ ),  $Q$  is the momentum transfer ( $\{4\pi/\lambda\}\sin(\theta/2)$ ,  $\theta$  scattering angle) and  $\rho_{oil}$ ,  $\rho_{shell}$ ,  $\rho_{core}$  represent the coherent scattering length density of the oil medium, shell, core respectively. The interfacial adsorbed layer thickness  $t_{surf}$  is  $R_D - R_C$ . For “shell” contrast  $\rho_{shell} \approx \rho_{oil}$  which reduces Eq. A2 to the better-known form factor for homogeneous spheres. Because  $P(Q,R)$  is size and shape sensitive, a polydispersity term  $p(R)$  is included in Eq. A1. This polydispersity was a Schultz distribution function  $p(R)$ , [4] defined by an average radius  $\bar{R}$  and a root mean square (RMS) deviation  $\sigma$  given by

$$\sigma = \left[ \overline{(R - \bar{R})^2} \right]^{1/2} = (\overline{R^2} - \bar{R}^2)^{1/2} = \bar{R} / (Z + 1)^{1/2} \quad (A3)$$

where  $Z$  is a width parameter. The polydispersity reported in Table 1 is  $\sigma / R_{D2O}$ . The SANS data were fitted using the interactive FISH program [5], which is a flexible multimodel package comprising a variety of different form factors  $P(Q)$ , structure factors  $S(Q)$ , and polydispersity functions. After extensive trials the most appropriate model was found to be for Schultz polydisperse two shell hard spheres.

## References – supporting material

[1] J. Eastoe, M. Sanchez-Dominguez, P. Wyatt, A. Beeby, R.K. Heenan, *Langmuir*, 2002, **18**, 7837.

[2] <http://www.isis.rl.ac.uk> and <http://www.ill.fr>

[3] I. Markovic, R.H. Ottewill, D.J. Cebula, I. Field, J. Marsh, *Col. Polym. Sci.*, 1984, **262**, 648.

[4] M. Kottlarchyk, S-H. Chen, J.S. Huang, M.W. Kim, *Phys. Rev. A*, 1984, **29**, 2054.

[5] Heenan, R. K. *FISH Data Analysis Program*; Rutherford Appleton Laboratory; Report RAL-89-129; CCLRC: Didcot, U.K., 1989, contact [rkh@isis.rl.ac.uk](mailto:rkh@isis.rl.ac.uk).

# Supplementary Material (ESI) for Chemical Communications

# This journal is © The Royal Society of Chemistry 2005

**Table A.** Changes in volume fraction of D<sub>2</sub>O ( $\phi_{D_2O}$ ) and water core radius  $R_{D_2O}$  incorporated

into the microemulsion phase as a function of  $X_{SGP}$  and  $w_0$ , before and after irradiation, as

obtained from SANS analysis of “core” contrast data with D<sub>2</sub>O:SGP + DDAB:*n*-heptane. T =

50 °C, [SGP + DDAB] = 0.10 mol dm<sup>-3</sup>. Uncertainties:  $\phi_{D_2O} \pm 10\%$ ,  $R_{D_2O} \pm 2 \text{ \AA}$ .

| $X_{SGP}(\%)$ | $w_0$ | before UV<br>$\phi_{D_2O}$ | after UV<br>$\phi_{D_2O}$ | $\Delta(\phi_{D_2O})$ | % solubilised<br>D <sub>2</sub> O change | before UV<br>$R_{D_2O} / \text{ \AA}$ | after UV<br>$R_{D_2O} / \text{ \AA}$ |
|---------------|-------|----------------------------|---------------------------|-----------------------|------------------------------------------|---------------------------------------|--------------------------------------|
| 0             | 25    | 0.045                      | 0.045                     | -                     | -                                        | 44.1                                  | 45.5                                 |
| 2.5           | 25    | 0.023                      | 0.040                     | 0.017                 | 174                                      | 23.1                                  | 40.1                                 |
|               | 30    | 0.034                      | 0.050                     | 0.016                 | 148                                      | 33.9                                  | 50.5                                 |
| 4.0           | 25    | 0.033                      | 0.041                     | 0.008                 | 123                                      | 33.1                                  | 40.8                                 |
|               | 30    | 0.040                      | 0.053                     | 0.013                 | 132                                      | 40.1                                  | 53.0                                 |
| 7.5           | 25    | 0.033                      | 0.044                     | 0.011                 | 134                                      | 33.2                                  | 44.2                                 |
|               | 30    | 0.041                      | 0.055                     | 0.014                 | 134                                      | 41.2                                  | 55.0                                 |
